# Supplementary material for: Females with Type 2 Diabetes Mellitus Are Prone to Diabetic Retinopathy: A Twelve-Province Cross-Sectional Study in China
Source: Hindawi journal article supplement (doi:10.1155/2020/5814296), 2020-04-21

**Supplemental Table 1: Classification of diabetic retinopathy. Diabetic retinopathy domestic typing (1985)**

| <b>Type</b>                      | <b>Stage</b> | <b>Retinopathy</b>                                  |
|----------------------------------|--------------|-----------------------------------------------------|
| Non-proliferative<br>retinopathy | I            | microaneurysms or combined with small blood loss    |
|                                  | II           | stage I + hard exudates                             |
|                                  | III          | stage II + cotton wool spots                        |
|                                  | IV           | neovascularization in addition to the above lesions |
| Proliferative retinopathy        | V            | neovascularization and proliferative membranes form |
|                                  | VI           | stage V with retinal detachment                     |

**Supplementary figure legend:**

**Fig. S1: Per capita gross regional product of 2018 in China.** Data source: National Bureau of Statistics.

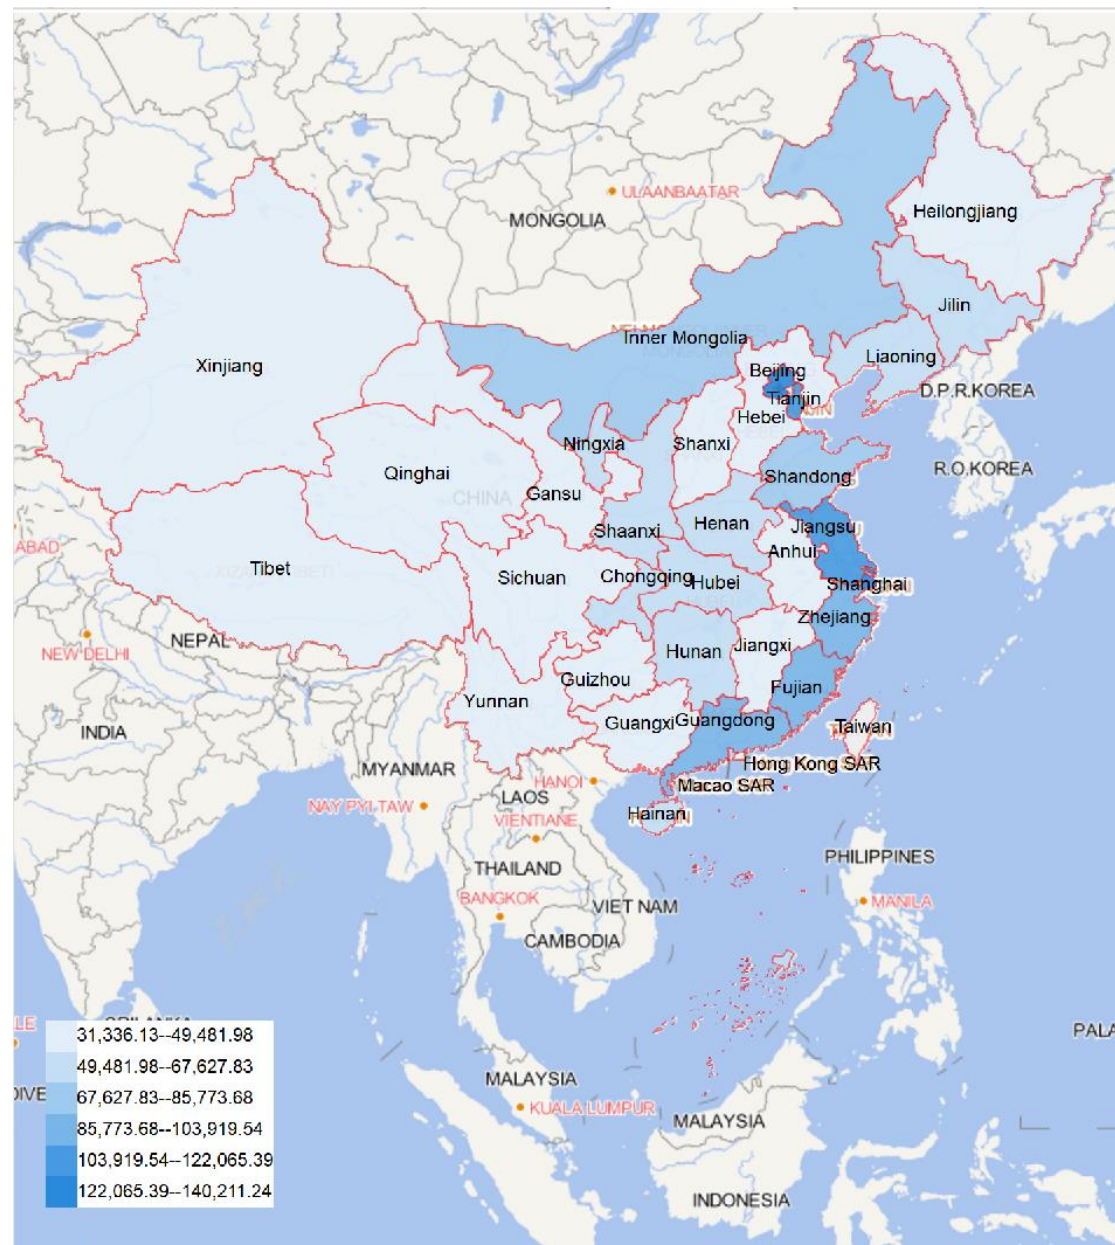

Supplement: f1 [file 5814296.f1.pdf]
